# Supplementary material
Source: HighWire-hosted journal article supplement (https://www.cmaj.ca/highwire/filestream/74007/field_highwire_adjunct_files/1/190085-ana-2-at.pdf)
Supplement: 190085-ana-2-at.pdf [file 190085-ana-2-at.pdf]

**Appendix 2 (as supplied by the authors): Summary of confounder, mediator and collider paths based on the hypothetical Directed Acyclic Graph in Figure 1 on the effect of transitional care (exposure) on ED visits (outcome)**

| Path*                                                                                                                                           | Type of association | Status of adjusted* variable                                                                             | Effect of adjustment                                                                                          |
|-------------------------------------------------------------------------------------------------------------------------------------------------|---------------------|----------------------------------------------------------------------------------------------------------|---------------------------------------------------------------------------------------------------------------|
| "transitional care" ← ["comorbidity"] → "ED visits"                                                                                             | Non-causal          | "Comorbidity" is a common cause of the exposure and outcome, i.e. a confounder                           | Confounding correctly blocked by adjusting for "comorbidity"                                                  |
| "transitional care" → ["continuity of care"] → "ED visits"                                                                                      | Causal              | "Continuity of care" is on the causal pathway between exposure and outcome, i.e. a mediator              | Part of the effect of exposure on outcome erroneously blocked by adjusting for "continuity of care"           |
| "transitional care" → ["patient satisfaction"] ← "beliefs/values" → "ED visits"                                                                 | Non-causal          | "Patient satisfaction" is a common effect of exposure and of a predictor of the outcome, i.e. a collider | Spurious association between exposure and outcome erroneously created by adjusting for "patient satisfaction" |
| Footnote: ED: Emergency Department.<br>*Brackets around a variable indicate adjustment. Arrows represent causal associations between variables. |                     |                                                                                                          |                                                                                                               |
